# Supplementary material for: Food Insecurity and Gender in Turbulent Times: Evidence from New Data for Egypt
Source: Research Square preprint supplement (doi:10.21203/rs.3.rs-6744214/v1), 2025-06-17
Supplement: Supplementary file 1 [file 65d223c316e749e38732c148.docx]

**Appendix**

Table A1: Alternative Measures of Food Security and Gender I

|  | Unable Usual Eat | Unable bc shortage | Unable bc price inc. | Unable bc income dec. | Red meals | Meal comp |
| --- | --- | --- | --- | --- | --- | --- |
|  |
| Ln(Age) | -0.0307 | -0.0373 | -0.0296 | -0.0591 | 0.0703 | -0.0519 |
|  | (0.109) | (0.117) | (0.116) | (0.121) | (0.133) | (0.116) |
| Ln(Hhsize) | 0.120 | 0.0369 | 0.186** | 0.299*** | 0.157* | 0.268*** |
|  | (0.0814) | (0.0765) | (0.0816) | (0.0864) | (0.0817) | (0.0805) |
| Married | -0.0245 | 0.167* | 0.164* | 0.122 | 0.0887 | 0.145 |
|  | (0.0916) | (0.101) | (0.0912) | (0.0946) | (0.0999) | (0.0923) |
| Rural | -0.0379 | 0.0706 | 0.131** | 0.0553 | 0.135** | 0.236*** |
|  | (0.0528) | (0.0549) | (0.0647) | (0.0667) | (0.0655) | (0.0636) |
| Female | 0.0363 | -0.0881 | -0.00704 | -0.0917 | 0.0308 | 0.103 |
|  | (0.0567) | (0.0636) | (0.0691) | (0.0705) | (0.0653) | (0.0714) |
| Female Head | 0.452*** | 0.251 | 0.382** | 0.410** | 0.0394 | 0.357** |
|  | (0.167) | (0.165) | (0.178) | (0.198) | (0.162) | (0.158) |
| Education | -0.270* | -0.199 | -0.446*** | -0.385*** | -0.372*** | -0.278** |
|  | (0.138) | (0.131) | (0.141) | (0.142) | (0.144) | (0.134) |
| Ukraine | 0.577 | 0.689 | 1.701*** | 1.336** | 1.877*** | 1.705*** |
|  | (0.599) | (0.510) | (0.644) | (0.629) | (0.566) | (0.601) |
| Dom. Pol. | 0.426 | 0.482 | 1.554*** | 1.050 | 1.053 | 1.340** |
|  | (0.683) | (0.540) | (0.547) | (0.672) | (0.650) | (0.604) |
| Constant | -0.141 | -0.148 | -1.034** | -0.690 | -1.189** | -1.137* |
|  | (0.589) | (0.580) | (0.511) | (0.617) | (0.603) | (0.584) |
| Observations | 1,449 | 1,449 | 1,449 | 1,449 | 1,449 | 1,449 |
| R-squared | 0.139 | 0.069 | 0.142 | 0.141 | 0.117 | 0.146 |

(i) Robust standard errors in parentheses. (ii) *** p<0.01, ** p<0.05, * p<0.1. (iii) Individual weights are used.

Table A2: Alternative Measures of Food Security and Gender II

|  | Unable Usual Eat | Unable bc shortage | Unable bc price inc. | Unable bc income dec. | Red meals | Meal comp |
| --- | --- | --- | --- | --- | --- | --- |
|  |
| Ln(Age) | -0.0365 | -0.0410 | -0.0363 | -0.0665 | 0.0670 | -0.0579 |
|  | (0.102) | (0.120) | (0.109) | (0.114) | (0.129) | (0.111) |
| Ln(Hhsize) | 0.137* | 0.0478 | 0.205*** | 0.321*** | 0.166** | 0.286*** |
|  | (0.0783) | (0.0751) | (0.0775) | (0.0813) | (0.0809) | (0.0774) |
| Married | -0.00755 | 0.178* | 0.183** | 0.143 | 0.0983 | 0.163* |
|  | (0.0891) | (0.101) | (0.0885) | (0.0910) | (0.0978) | (0.0901) |
| Rural | -0.0458 | 0.0655 | 0.122* | 0.0453 | 0.131** | 0.227*** |
|  | (0.0523) | (0.0550) | (0.0641) | (0.0660) | (0.0655) | (0.0633) |
| Fem. in Male HH | -0.00234 | -0.113* | -0.0515 | -0.141** | 0.00884 | 0.0629 |
|  | (0.0543) | (0.0639) | (0.0665) | (0.0664) | (0.0656) | (0.0705) |
| Male in Fem. HH | -0.279* | -0.217** | -0.458*** | -0.519*** | -0.376*** | -0.406*** |
|  | (0.145) | (0.0981) | (0.149) | (0.190) | (0.141) | (0.119) |
| Fem. in Fem. HH | 0.656*** | 0.270 | 0.567*** | 0.531*** | 0.165 | 0.634*** |
|  | (0.0893) | (0.180) | (0.0889) | (0.0935) | (0.179) | (0.0878) |
| Education | -0.293** | -0.214* | -0.472*** | -0.414*** | -0.385*** | -0.302** |
|  | (0.135) | (0.130) | (0.138) | (0.137) | (0.144) | (0.133) |
| Ukraine | 0.605 | 0.706 | 1.732*** | 1.371** | 1.893*** | 1.734*** |
|  | (0.586) | (0.494) | (0.635) | (0.597) | (0.569) | (0.577) |
| Dom. Pol. | 0.463 | 0.506 | 1.597*** | 1.097* | 1.074* | 1.378** |
|  | (0.668) | (0.530) | (0.534) | (0.650) | (0.651) | (0.589) |
| Constant | -0.142 | -0.149 | -1.035** | -0.691 | -1.189** | -1.138** |
|  | (0.559) | (0.565) | (0.475) | (0.572) | (0.593) | (0.552) |
| Observations | 1,449 | 1,449 | 1,449 | 1,449 | 1,449 | 1,449 |
| R-squared | 0.180 | 0.083 | 0.172 | 0.180 | 0.125 | 0.171 |

(i) Robust standard errors in parentheses. (ii) *** p<0.01, ** p<0.05, * p<0.1. (iii) Individual weights are used.

Table A3: Food Security, Gender and Working Status

|  | Any dim. | Any dim. | Index | Index |
| --- | --- | --- | --- | --- |
| Ln(Age) | -0.0805 | -0.0328 | -0.268 | -0.144 |
|  | (0.121) | (0.118) | (0.331) | (0.318) |
| Ln(Hhsize) | 0.157** | 0.168** | 0.448** | 0.470*** |
|  | (0.0787) | (0.0741) | (0.193) | (0.177) |
| Married | 0.0778 | 0.0572 | 0.303 | 0.243 |
|  | (0.0871) | (0.0852) | (0.244) | (0.238) |
| Education | -0.449*** | -0.441*** | -1.247*** | -1.234*** |
|  | (0.121) | (0.123) | (0.300) | (0.303) |
| Rural | 0.218*** | 0.225*** | 0.311** | 0.332** |
|  | (0.0619) | (0.0591) | (0.149) | (0.139) |
| Female | 0.236*** | 0.198*** | 0.380* | 0.291* |
|  | (0.0747) | (0.0664) | (0.205) | (0.170) |
| Female Head | 0.435*** | 0.440*** | 1.395*** | 1.409*** |
|  | (0.0913) | (0.0962) | (0.290) | (0.301) |
| Ukraine | 2.203*** | 2.269*** | 4.871*** | 5.099*** |
|  | (0.555) | (0.549) | (1.394) | (1.425) |
| Dom. Pol. | 1.879*** | 1.859*** | 3.897*** | 3.878*** |
|  | (0.542) | (0.541) | (1.399) | (1.392) |
| Employed | 0.246*** |  | 0.687*** |  |
|  | (0.0690) |  | (0.196) |  |
| Female Head*Employed | -0.551** |  | -1.383 |  |
|  | (0.279) |  | (0.881) |  |
| Wage worker |  | 0.286*** |  | 0.843*** |
|  |  | (0.0669) |  | (0.195) |
| Female Head*Wage worker |  | -0.635** |  | -1.650* |
|  |  | (0.282) |  | (0.889) |
| Constant | -1.264** | -1.405*** | -3.007** | -3.411*** |
|  | (0.516) | (0.510) | (1.312) | (1.300) |
| Observations | 1,449 | 1,449 | 1,449 | 1,449 |
| R-squared | 0.164 | 0.179 | 0.213 | 0.242 |

(i) Robust standard errors in parentheses. (ii) *** p<0.01, ** p<0.05, * p<0.1. (iii) Individual weights are used.

Table A4: Probit Model I

|  | Any | Unable Usual Eat | Unable bc shortage | Unable bc price inc. | Unable bc income dec. | Red meals | Meal comp |
| --- | --- | --- | --- | --- | --- | --- | --- |
|  | dim |
| Ln(Age) | -0.0446 | -0.118 | -0.0758 | -0.0883 | -0.185 | 0.172 | -0.193 |
|  | (0.320) | (0.445) | (0.393) | (0.336) | (0.362) | (0.390) | (0.334) |
| Ln(Hhsize) | 0.586** | 0.527 | 0.128 | 0.531** | 0.880*** | 0.505** | 0.783*** |
|  | (0.238) | (0.328) | (0.261) | (0.244) | (0.269) | (0.254) | (0.244) |
| Married | 0.248 | -0.211 | 0.584* | 0.443 | 0.374 | 0.299 | 0.414 |
|  | (0.255) | (0.385) | (0.353) | (0.279) | (0.292) | (0.309) | (0.274) |
| Rural | 0.568*** | -0.181 | 0.273 | 0.374** | 0.166 | 0.421** | 0.647*** |
|  | (0.171) | (0.259) | (0.217) | (0.183) | (0.196) | (0.201) | (0.178) |
| Education | -1.123*** | -1.125** | -0.663 | -1.257*** | -1.068** | -1.061** | -0.830* |
|  | (0.434) | (0.492) | (0.466) | (0.445) | (0.422) | (0.420) | (0.426) |
| Ukraine | 5.761*** | 2.356 | 2.554 | 4.987** | 3.850* | 5.912*** | 5.201** |
|  | (1.970) | (2.170) | (2.163) | (2.186) | (2.037) | (2.111) | (2.112) |
| Dom. Pol. | 4.755** | 2.126 | 1.976 | 4.722** | 3.062 | 3.333 | 4.144* |
|  | (2.075) | (2.290) | (2.527) | (2.135) | (2.128) | (2.209) | (2.141) |
| Female | 0.264 | 0.170 | -0.330 | -0.0191 | -0.256 | 0.133 | 0.318 |
|  | (0.197) | (0.262) | (0.246) | (0.207) | (0.219) | (0.216) | (0.209) |
| Female Head | 0.681 | 1.249** | 0.896* | 1.029** | 1.108* | 0.135 | 0.978** |
|  | (0.483) | (0.531) | (0.479) | (0.513) | (0.593) | (0.483) | (0.477) |
| Constant | -4.956*** | -2.568 | -2.551 | -4.581** | -3.472* | -5.235*** | -4.819** |
|  | (1.763) | (2.091) | (2.208) | (1.793) | (1.899) | (2.018) | (1.931) |
| Observations | 1,449 | 1,449 | 1,449 | 1,449 | 1,449 | 1,449 | 1,449 |

(i) Robust standard errors in parentheses. (ii) *** p<0.01, ** p<0.05, * p<0.1. (iii) Individual weights are used.

Table A5: Probit Model II

|  | Any | Unable Usual Eat | Unable bc shortage | Unable bc price inc. | Unable bc income dec. | Red meals | Meal comp |
| --- | --- | --- | --- | --- | --- | --- | --- |
|  | dim |
| Ln(Age) | -0.0706 | -0.132 | -0.0773 | -0.112 | -0.225 | 0.153 | -0.222 |
|  | (0.327) | (0.446) | (0.400) | (0.341) | (0.376) | (0.384) | (0.343) |
| Ln(Hhsize) | 0.673*** | 0.645** | 0.178 | 0.629*** | 1.015*** | 0.546** | 0.886*** |
|  | (0.239) | (0.323) | (0.258) | (0.244) | (0.267) | (0.253) | (0.247) |
| Married | 0.315 | -0.137 | 0.622* | 0.523* | 0.479 | 0.332 | 0.481* |
|  | (0.255) | (0.383) | (0.355) | (0.282) | (0.295) | (0.305) | (0.275) |
| Rural | 0.543*** | -0.230 | 0.253 | 0.344* | 0.128 | 0.405** | 0.621*** |
|  | (0.171) | (0.264) | (0.219) | (0.183) | (0.199) | (0.202) | (0.179) |
| Education | -1.230*** | -1.245** | -0.730 | -1.363*** | -1.208*** | -1.106*** | -0.940** |
|  | (0.439) | (0.497) | (0.471) | (0.455) | (0.420) | (0.424) | (0.431) |
| Ukraine | 6.036*** | 2.429 | 2.671 | 5.159** | 4.138** | 5.907*** | 5.483*** |
|  | (1.958) | (2.158) | (2.102) | (2.231) | (1.998) | (2.099) | (2.103) |
| Dom. Pol. | 4.947** | 2.231 | 2.140 | 4.875** | 3.302 | 3.353 | 4.353** |
|  | (2.085) | (2.281) | (2.517) | (2.135) | (2.120) | (2.213) | (2.144) |
| Fem. in Male HH | 0.154 | -0.0222 | -0.432* | -0.162 | -0.427** | 0.0622 | 0.203 |
|  | (0.197) | (0.260) | (0.256) | (0.205) | (0.216) | (0.218) | (0.211) |
| Male in Fem. HH | -1.771*** | -1.393* | -1.220* | -1.997*** | -1.951** | -1.777** |  |
|  | (0.681) | (0.772) | (0.647) | (0.692) | (0.770) | (0.720) |  |
| Fem. in Fem. HH | 1.661*** | 2.046*** | 0.870* | 1.752*** | 1.731*** | 0.532 | 2.035*** |
|  | (0.353) | (0.372) | (0.505) | (0.347) | (0.358) | (0.517) | (0.371) |
| Constant | -5.066*** | -2.608 | -2.659 | -4.651*** | -3.603* | -5.175*** | -4.951*** |
|  | (1.743) | (2.038) | (2.146) | (1.757) | (1.866) | (1.979) | (1.920) |
| Observations | 1,449 | 1,449 | 1,449 | 1,449 | 1,449 | 1,449 | 1,438 |

(i) Robust standard errors in parentheses. (ii) *** p<0.01, ** p<0.05, * p<0.1. (iii) Individual weights are used.
